# Supplementary material for: Thermoresponsive Cationic Polymers: PFAS Binding Performance under Variable pH, Temperature and Comonomer Composition
Source: MDPI journal article supplement (doi:10.3390/gels8100668), 2022-10-18
Supplement: s1 [file s1]

# Thermoresponsive Cationic Polymers: PFAS Binding Performance under Variable pH, Temperature and Comonomer Composition

## FTIR analysis

Attenuated total reflectance Fourier transform infrared (ATR-FTIR) was used to confirm successful incorporation of the cationic comonomers into the synthesized hydrogels with a Varian Inc. 7000e spectrometer. Dried samples were placed on a diamond ATR crystal and spectrums were obtained between 700 and 4,000  $\text{cm}^{-1}$ .

## Temperature dependent swelling study

Temperature responsiveness of each hydrogel was examined by allowing an approximately 10.0 mg piece of dry gel to equilibrate in 5 mL of aqueous solution (pH = 4, 7 or 10 of buffered solution as described above) for 24 h at various solution temperatures. Swelling ratios were measured at temperatures of 10, 20, 25, 30, 35, 40 and 50 °C. Mass measurements were collected by the same method described in the kinetic swelling study section above. The mass swelling ratio ( $Q_{eq}$ ) was calculated using:

$$Q_{eq} = \frac{m_s}{m_d}$$

## Additional Figures

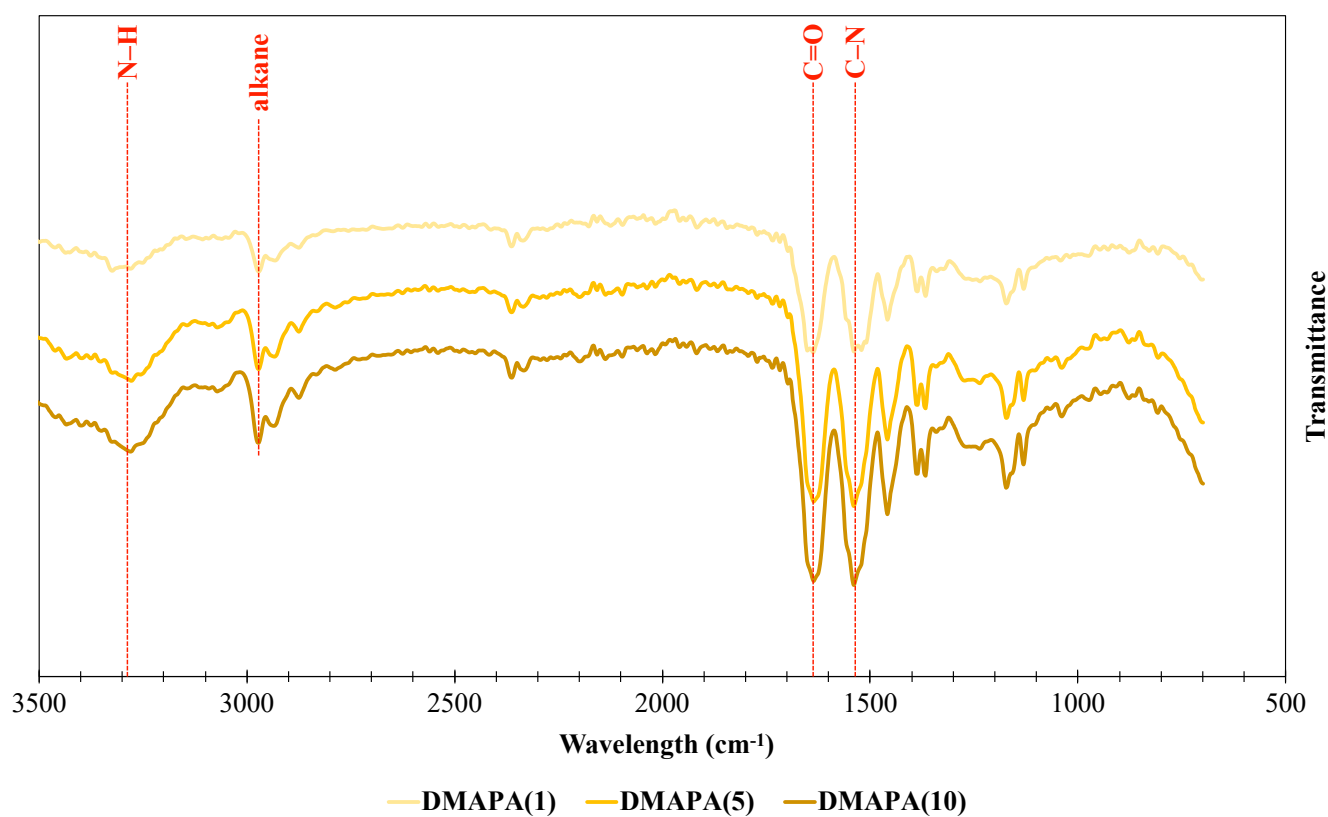

**Figure S1.** FTIR spectra for DMAPA hydrogels.

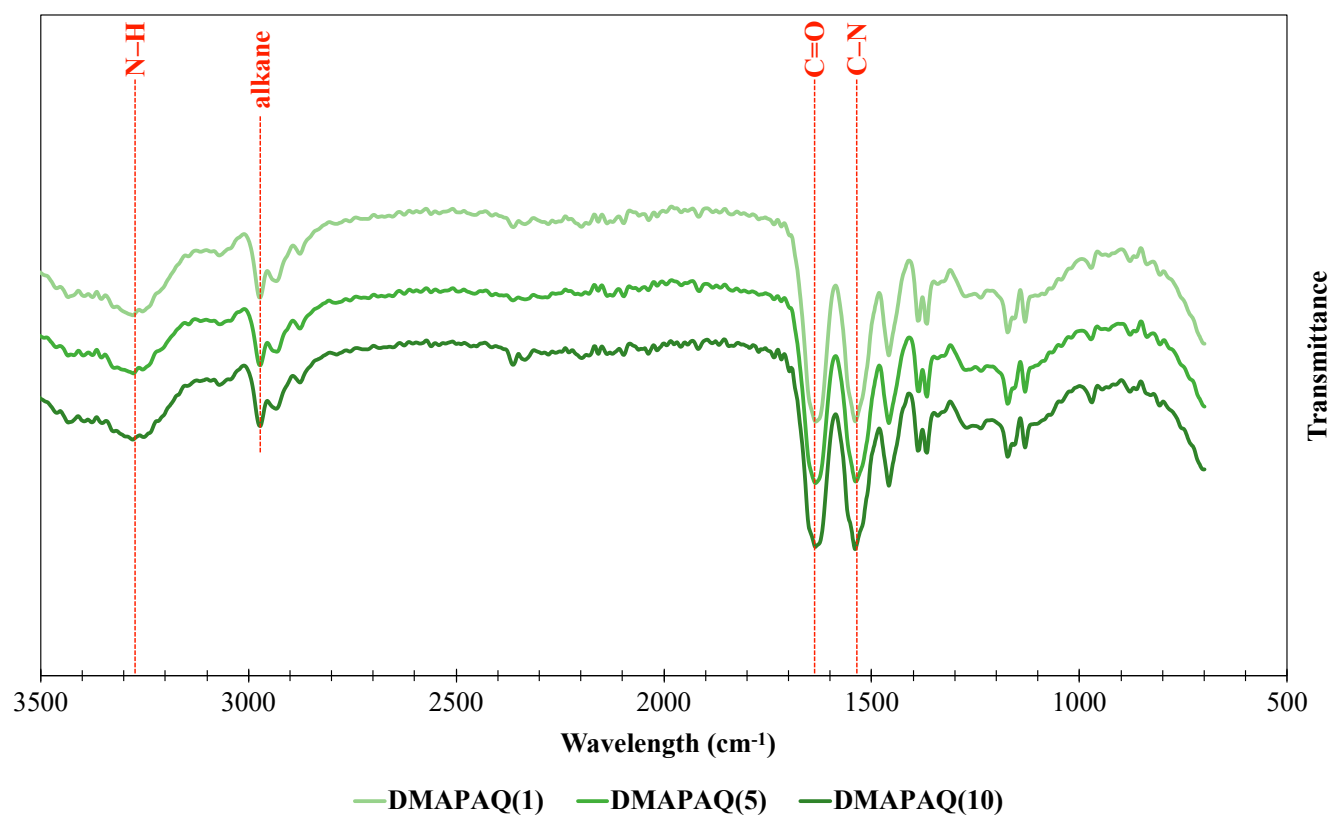

**Figure S2.** FTIR spectra for DMAPAQ hydrogels.

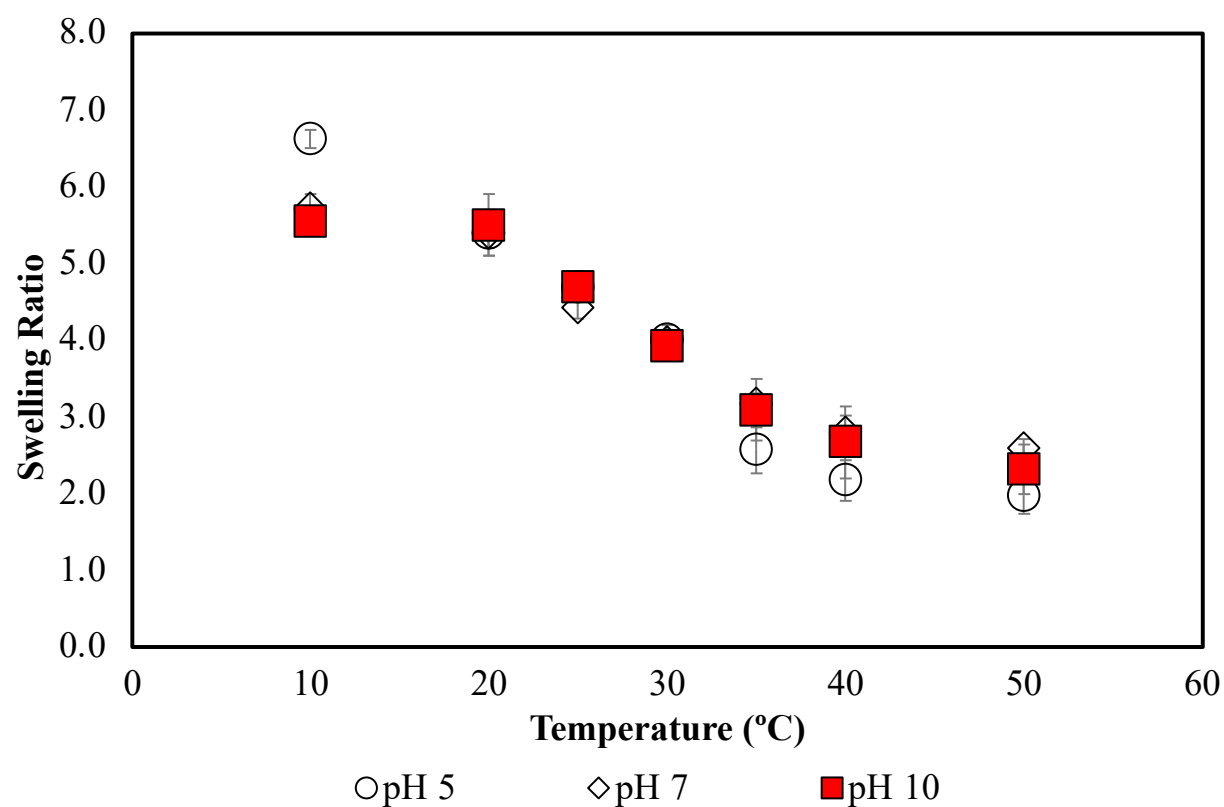

**Figure S3.** Equilibrium temperature responsive swelling behavior of crosslinked PNIPAAm (95 mol%) in various buffered aqueous pH solutions at  $t = 24$  h.  $N = 3$ , error bars represent  $\pm$  STD.

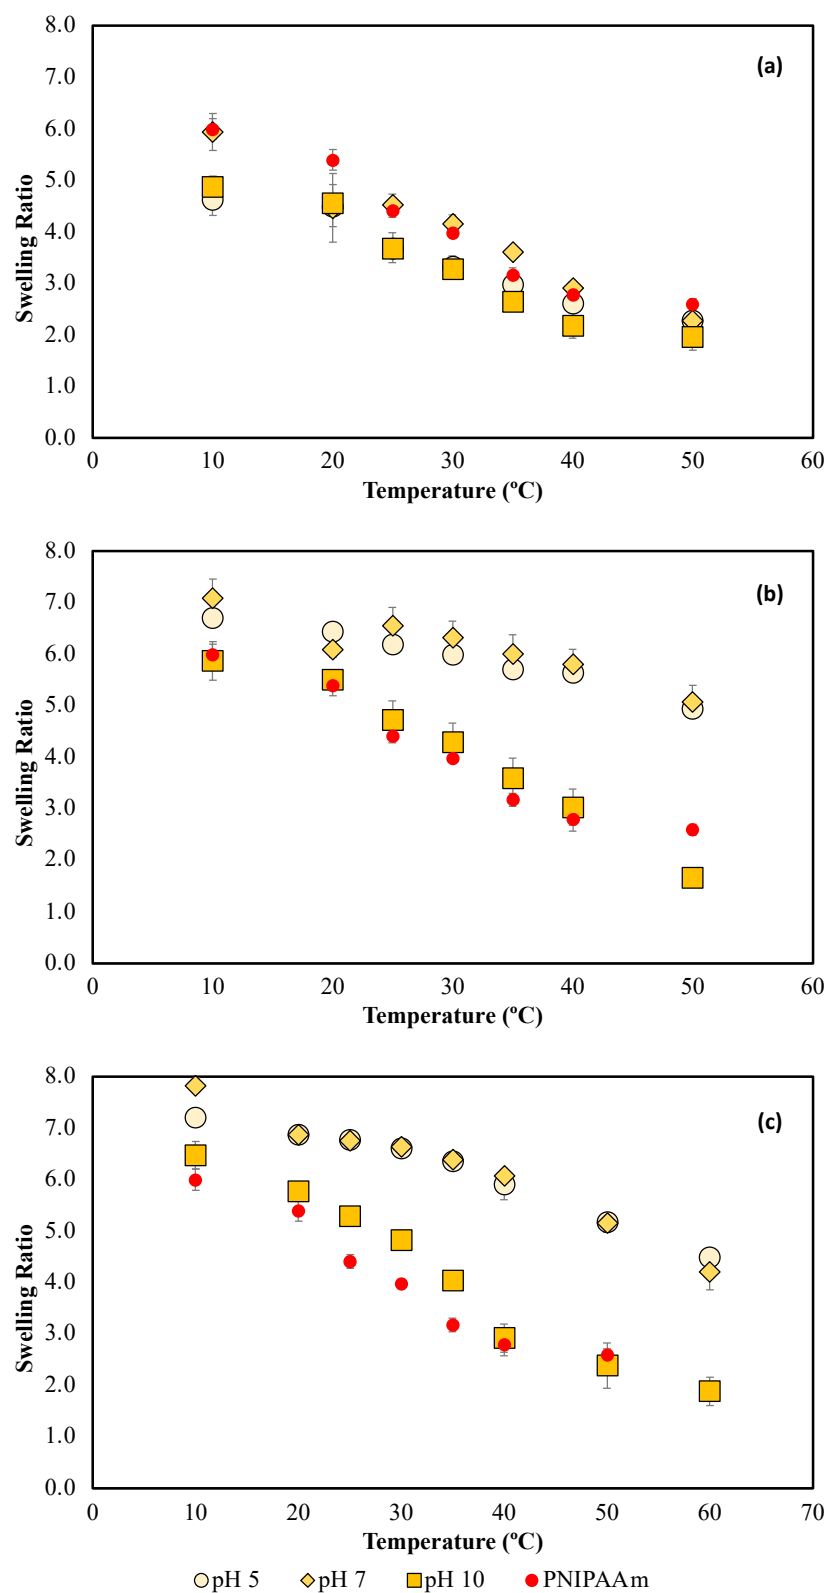

**Figure S4.** Equilibrium temperature responsive swelling behavior of crosslinked DMAPA hydrogels in various pH buffered aqueous solutions at  $t = 24$  h: **(a)** DMAPA(1) **(b)** DMAPA(5) and **(c)** DMAPA(10). Red circles indicate PNIPAAm swelling averages.  $N = 3$ , error bars represent  $\pm$  STD.

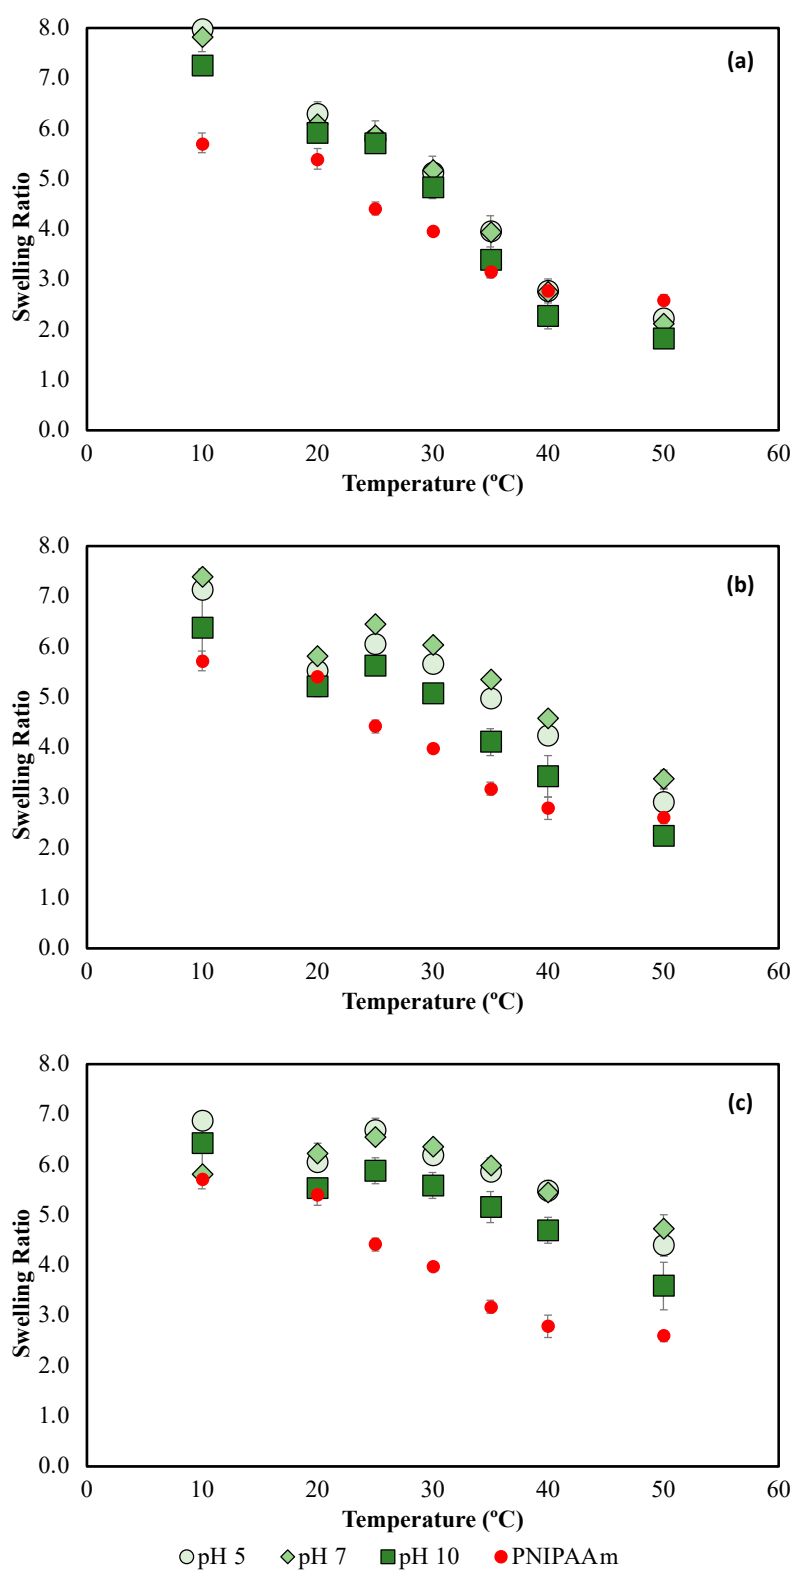

**Figure S5.** Equilibrium temperature responsive swelling behavior of crosslinked DMAPAQ hydrogels in various pH buffered aqueous solutions at  $t = 24$  h: (a) DMAPAQ(1) (b) DMAPAQ(5) and (c) DMAPAQ(10). Red circles indicate PNIPAAm swelling averages.  $N = 3$ , error bars represent  $\pm$  STD.
